# Supplementary material for: Endoplasmic reticulum stress increases exosome biogenesis and packaging relevant to sperm maturation in response to oxidative stress in obese mice
Source: PubMed Central journal article supplement (PMC9677646; doi:10.1186/s12958-022-01031-z), 2022-11-21

Figure-2C CD9/Flotilin1/CD63/TSG101

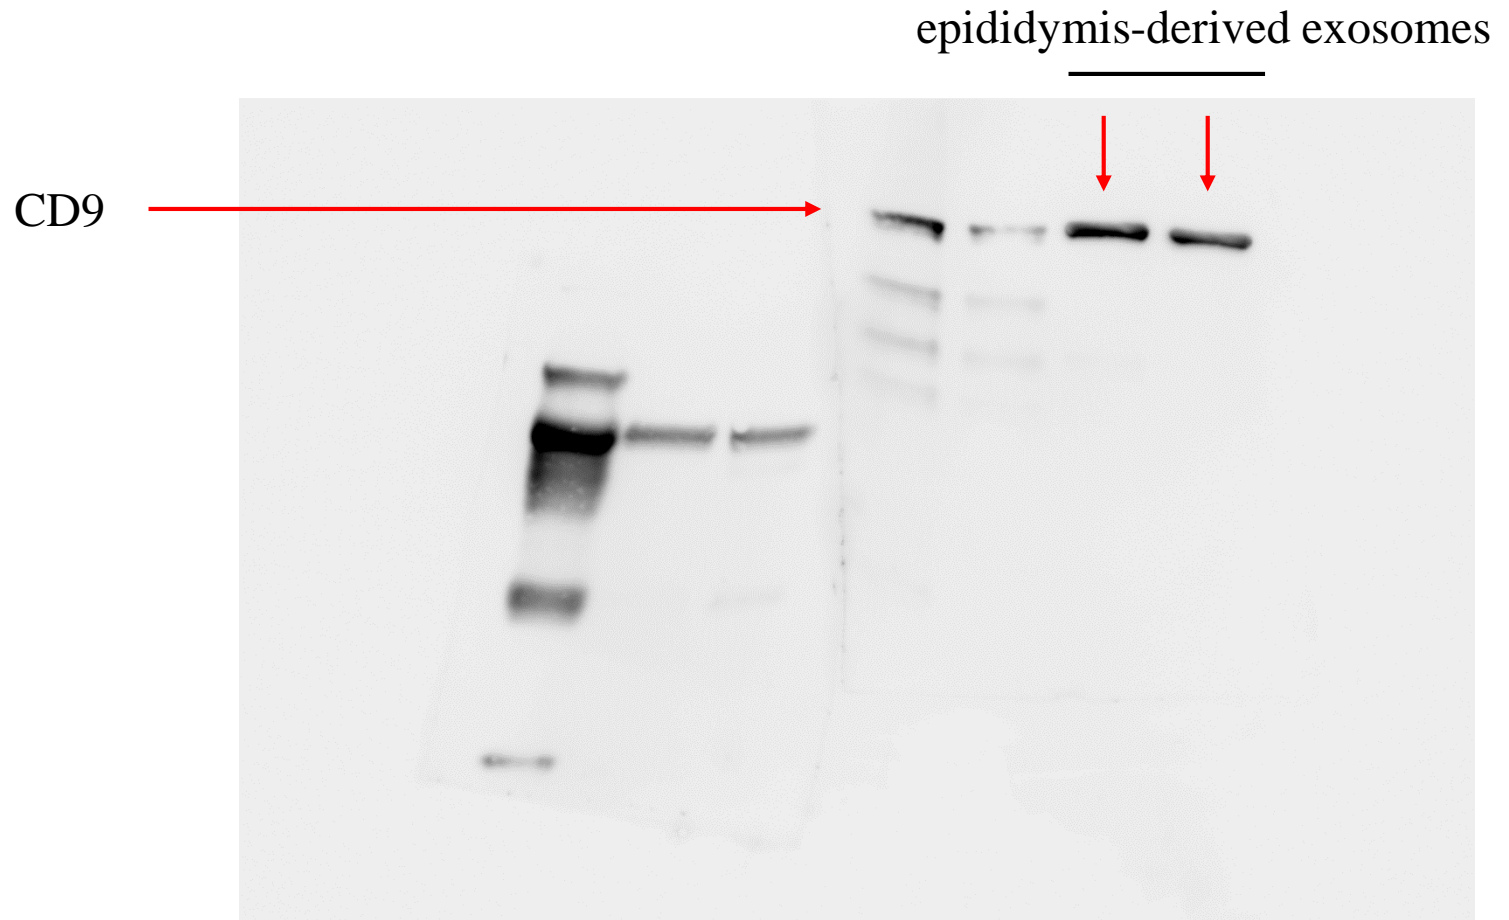

Figure-2C CD9/Flotilin1/CD63/TSG101

epididymis-derived exosomes

Flotilin1

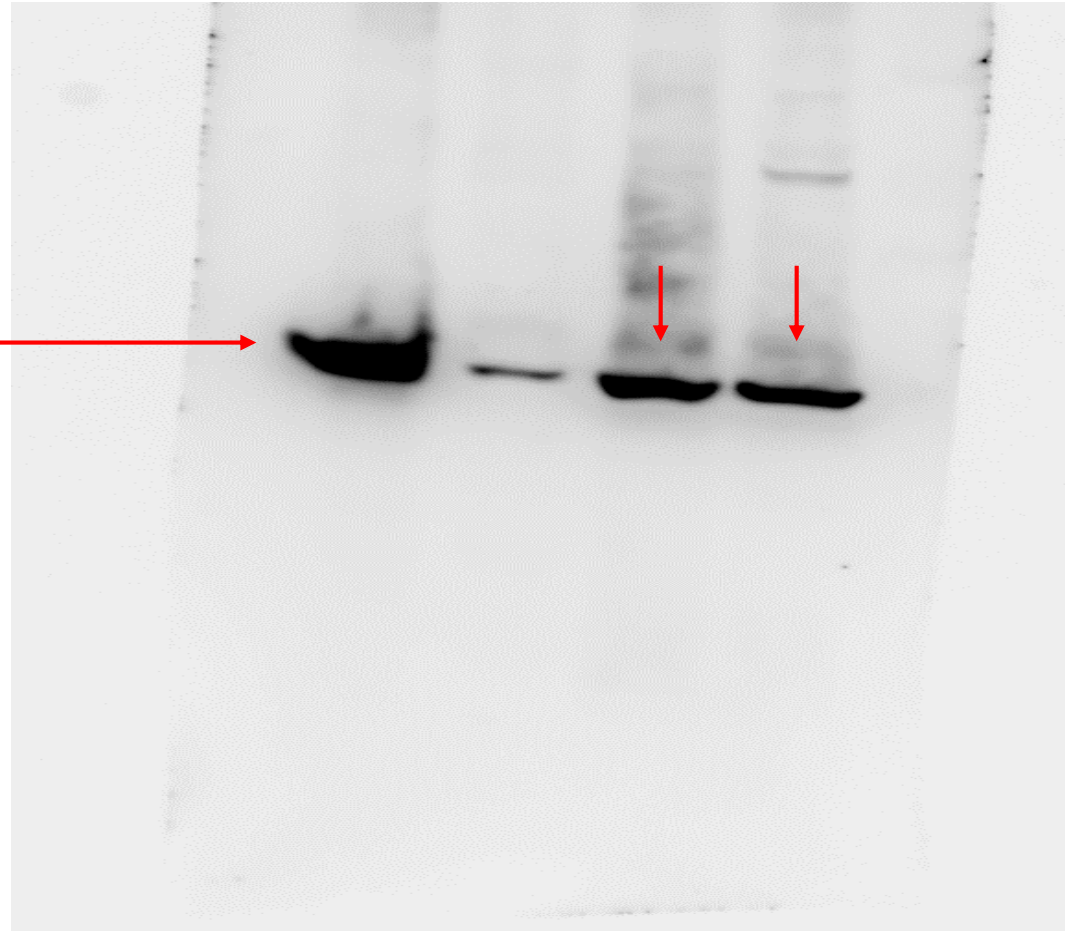

Figure-2C CD9/Flotilin1/CD63/TSG101

Cell protein

epididymis-derived exosomes

CD63

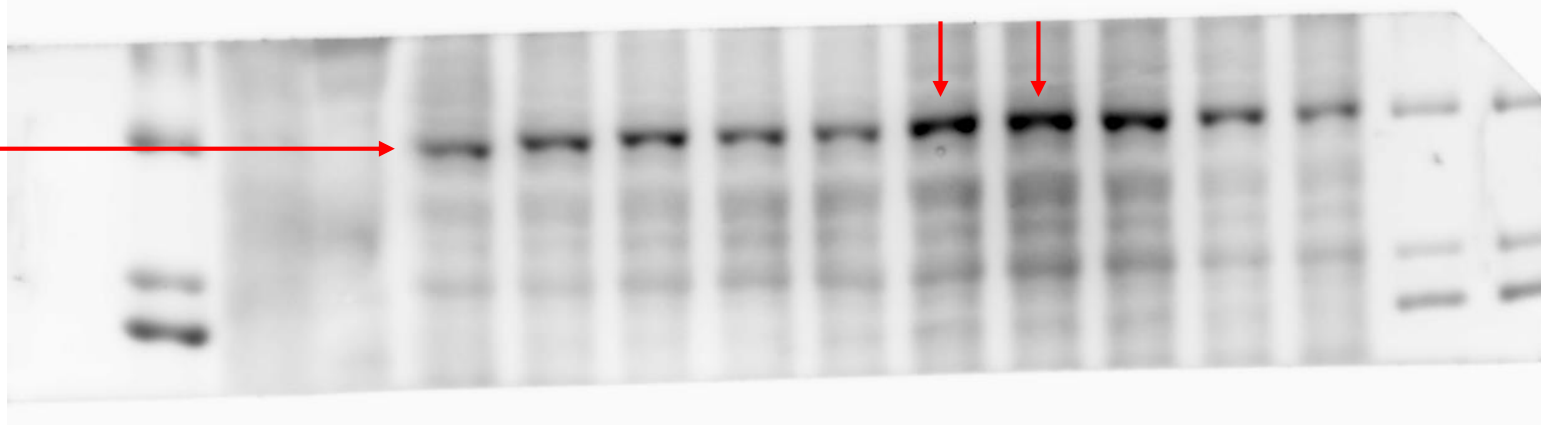

Figure-2C CD9/Flotilin1/CD63/TSG101

epididymis-derived exosomes

---

TSG101

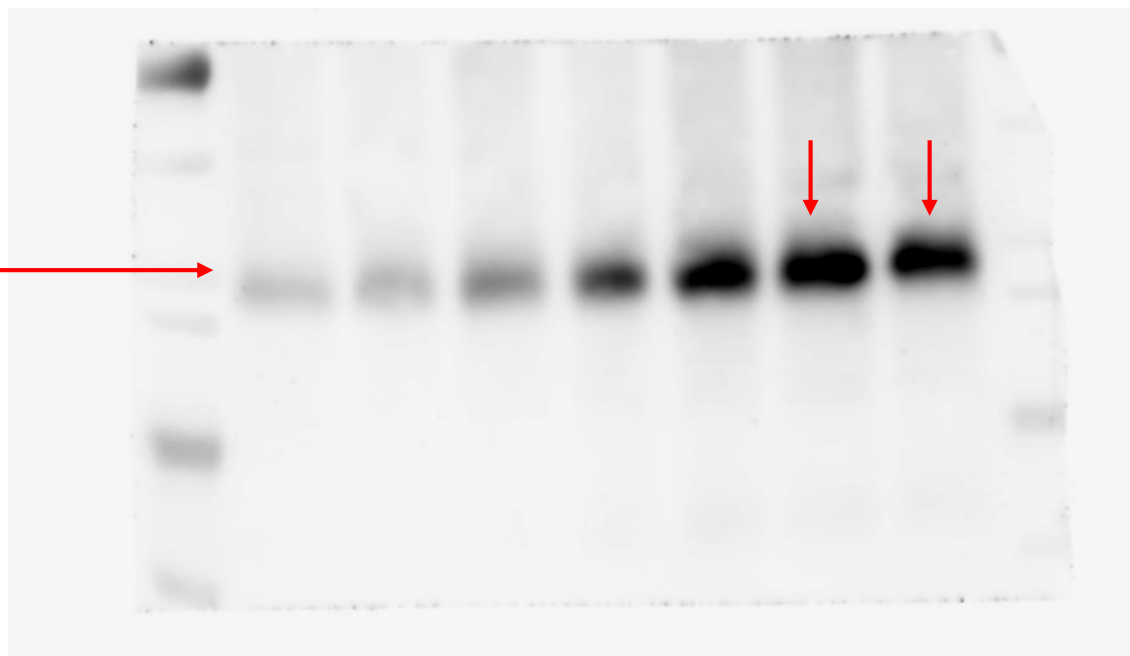

Supplement: 12958_2022_1031_MOESM1_ESM.pdf [file 12958_2022_1031_MOESM1_ESM.pdf]
