# Supplementary material for: Endoplasmic reticulum stress increases exosome biogenesis and packaging relevant to sperm maturation in response to oxidative stress in obese mice
Source: PubMed Central journal article supplement (PMC9677646; doi:10.1186/s12958-022-01031-z), 2022-11-21

Figure-5E:PERK/ $\beta$ -actin

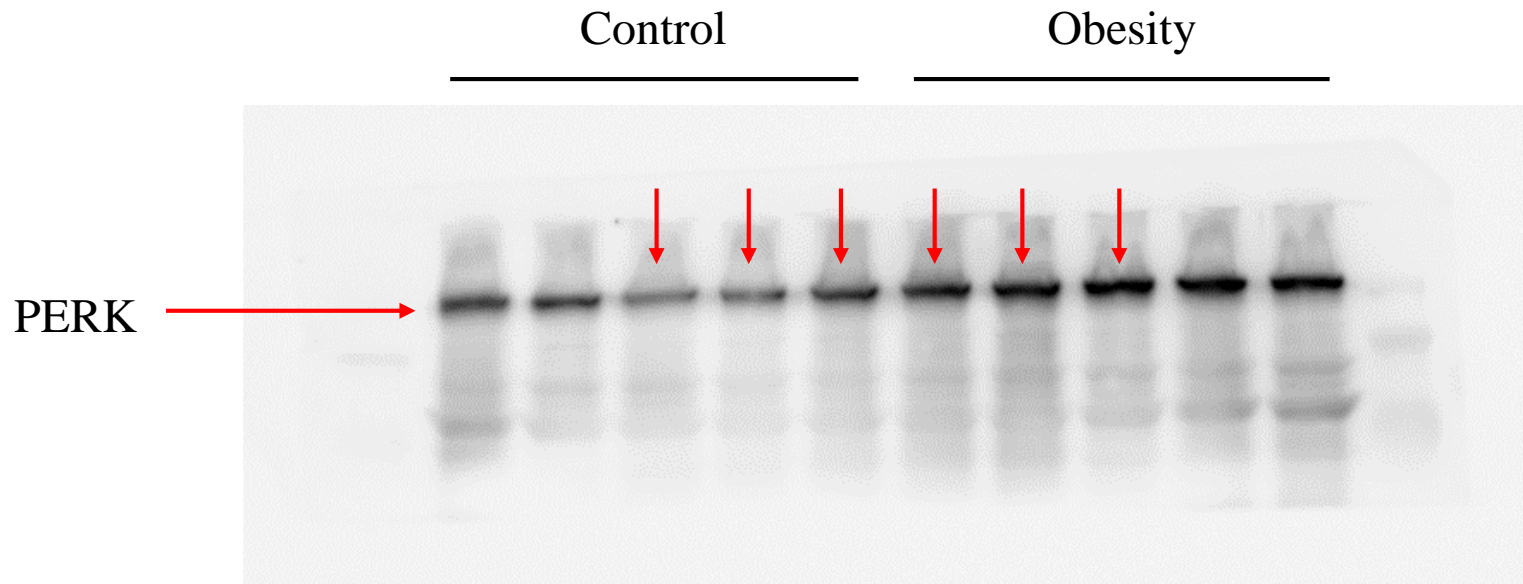

Figure-5E:PERK/ $\beta$ -actin

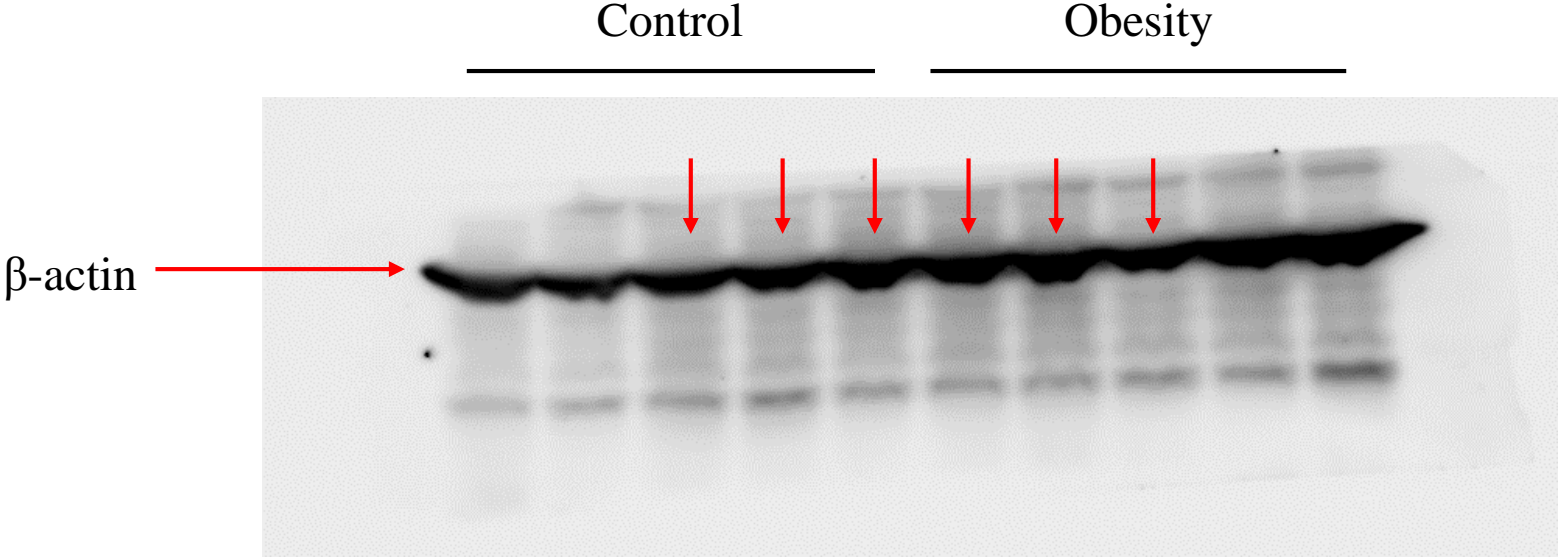

Figure-5E: IRE1 $\alpha$ / $\beta$ -actin

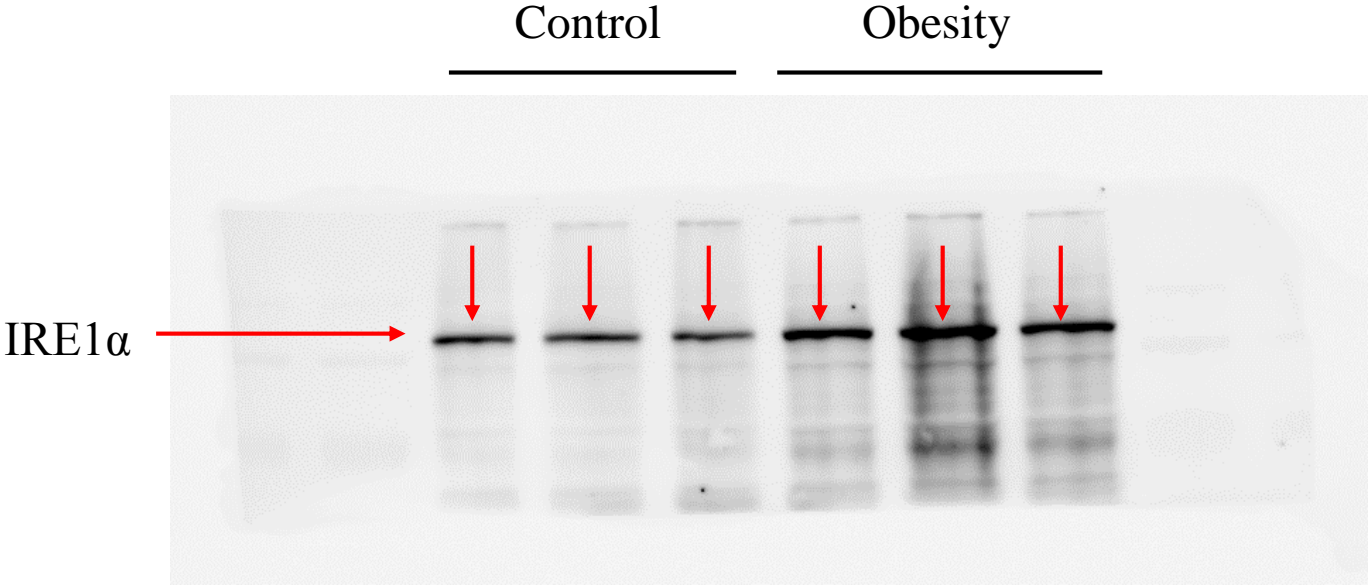

Figure-5E: IRE1 $\alpha$ / $\beta$ -actin

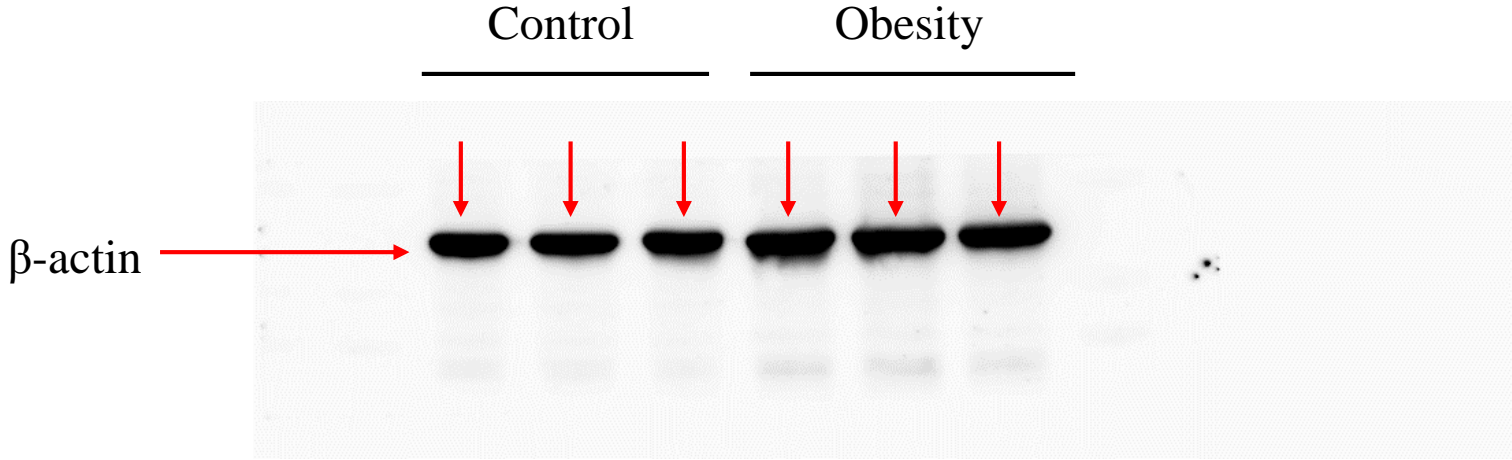

Supplement: 12958_2022_1031_MOESM5_ESM.pdf [file 12958_2022_1031_MOESM5_ESM.pdf]
